# Supplementary material for: Calorimetry of extracellular vesicles fusion to single phospholipid membrane
Source: publisher site journal article supplement (doi:10.1515/bmc-2022-0011), 2022-01-01
Supplement: Supplementary file 1 [file bmc-2022-0011_sm.pdf]

Supplementary Information for the manuscript:

## **Calorimetry of extracellular vesicles fusion to single phospholipid membrane**

M. Grava<sup>a</sup>, S. Helmy<sup>b, c</sup>, M. Gimona<sup>d, e</sup>, P. Parisse<sup>f</sup>, L. Casalis<sup>g</sup>, P. Brocca<sup>b, \*</sup>, V. Rondelli<sup>b, \*</sup>

*a. Department of Physics, Università degli Studi di Milano, Italy*

*b. Department of Medical Biotechnology and Translational Medicine, Università degli Studi di Milano, Italy*

*c. Biophysics Group, Physics Department, Faculty of Science, Ain Shams University, Egypt*

*d. GMP Unit, Spinal Cord Injury and Tissue Regeneration Center Salzburg, Paracelsus Medical University (PMU), Salzburg, Austria*

*e. Research Program “Nanovesicular Therapies”, Paracelsus Medical University, Salzburg*

*f. CNR-IOM, Trieste, Italy*

*g. Elettra Sincrotrone Trieste, Trieste, Italy*

\*Corresponding authors

valeria.rondelli@unimi.it

paola.brocca@unimi.it

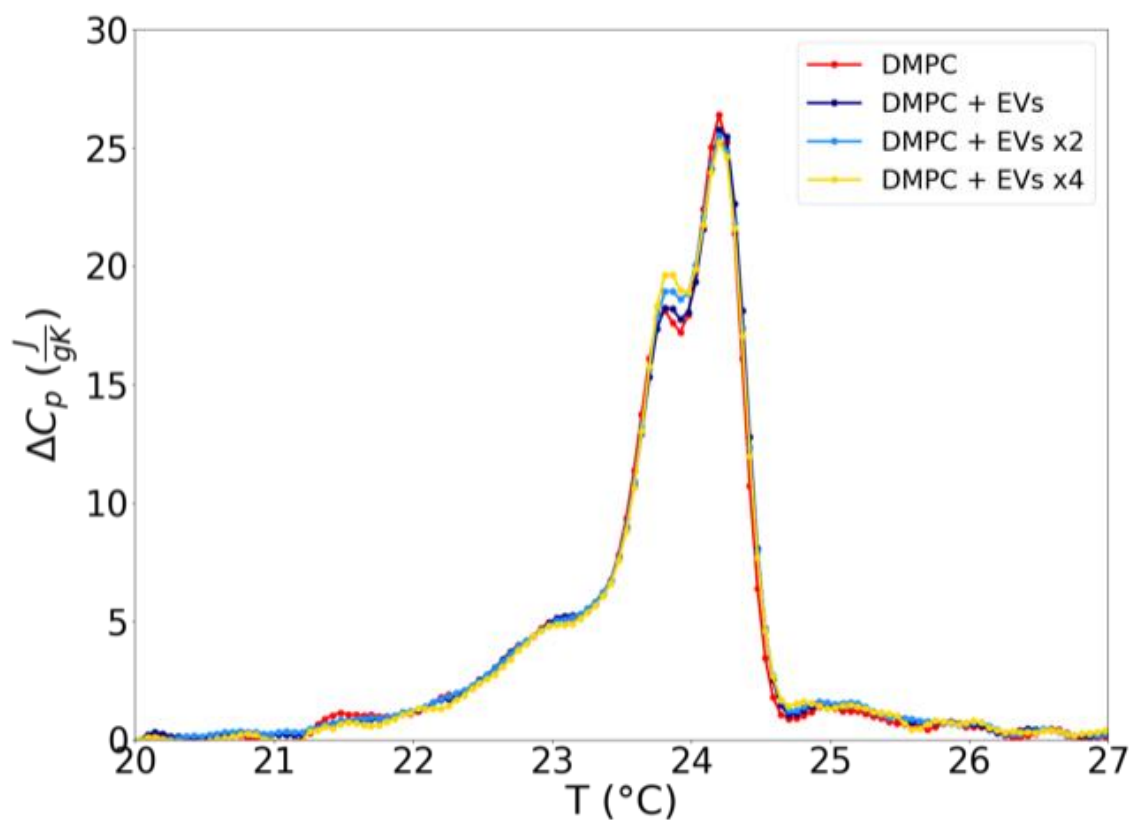

Figure 1S. Thermographs of DMPC LUVs before and after addition of EVs in increasing amounts. Heating mode after equilibration. Scan rate 1 °C / 3 min.

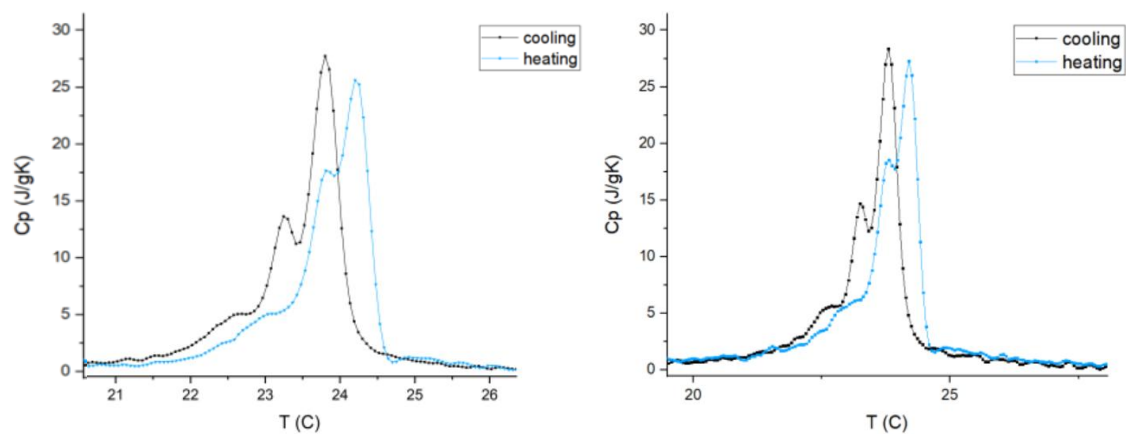

Figure 2S. Comparison of heating and cooling subsequent scans after equilibration of DMPC LUVs before (left) and after the last addition of EVs (right). Scan rate 1 °C / 3 min.
